# Supplementary material for: The competition between Si–Si and Si–C cleavage in functionalised oligosilanes: their reactivity with elemental lithium
Source: Royal Society of Chemistry journal article supplement (doi:10.1039/b920846a), 2010-01-01
Supplement: b920846a.pdf [file b920846a.pdf]

**Supporting information (computational details) belonging to the publication**

**“The Competition Between Si–Si and Si–C Cleavage in  
Functionalised Oligosilanes: About their Reactivity with  
Elemental Lithium”**

Christian Däschlein and Carsten Strohmann\*

Anorganische Chemie, Technische Universität Dortmund, Otto-Hahn-Straße 6, 44227 Dortmund,  
Germany

Fax: (+49)231-755-7062, E-mail: mail@carsten-strohmann.de

## **Index**

|                                                                       |     |
|-----------------------------------------------------------------------|-----|
| Computational Details of compounds <b>1, 8, 4, 10, 3</b> and <b>9</b> | P2  |
| Literature                                                            | P18 |

## Computational Details

All calculations were done without symmetry restrictions. Starting coordinates were obtained with Chem3DUltra 10.0. Optimization and additional harmonic vibrational frequency analyses (to establish the nature of stationary points on the potential energy surface) were performed with the software package Gaussian 03 (Revision D.01 and Revision E.01)<sup>[1]</sup> on the B3LYP/6-31+G(d) level. Thereby, no imaginary frequencies were obtained. The starting structural parameters for the systems were taken from the X-ray data of (S)-**1**·HCl<sup>[2]</sup> and (R)-**3**·HCl.<sup>[3]</sup> All other compounds were constructed based thereon with *Chem3D*. Each molecule was optimized both, as neutral compound and as radical anion as the first step of the reaction is supposed to be an electron transfer from the metal to the silane (possible interactions between the radical anion and the metal have not been considered in these calculations). The total (SCF) and zero-point energies (ZPE) of all systems can be found in Tab. 1. The calculated standard orientations of all investigated silanes can be found in Tab. 2 to Tab. 13.

**Tab. 1** Total (SCF) and zero-point energies (ZPE) of all calculated systems.

| compound              | Method/Basis    | Min./TS     | SCF [Hartree] | ZPE [Hartree] |
|-----------------------|-----------------|-------------|---------------|---------------|
| <b>1</b>              | B3LYP/6-31+G(d) | Global Min. | -1644.467099  | -1643.940472  |
| <b>1<sup>-</sup></b>  | B3LYP/6-31+G(d) | Global Min. | -1644.459014  | -1643.938856  |
| <b>8</b>              | B3LYP/6-31+G(d) | Global Min. | -1260.987489  | -1260.569191  |
| <b>8<sup>-</sup></b>  | B3LYP/6-31+G(d) | Global Min. | -1260.972001  | -1260.557901  |
| <b>4</b>              | B3LYP/6-31+G(d) | Global Min. | -1629.846083  | -1630.339755  |
| <b>4<sup>-</sup></b>  | B3LYP/6-31+G(d) | Global Min. | -1629.836490  | -1630.324531  |
| <b>10</b>             | B3LYP/6-31+G(d) | Global Min. | -1452.728037  | -1452.255706  |
| <b>10<sup>-</sup></b> | B3LYP/6-31+G(d) | Global Min. | -1452.717959  | -1452.251796  |
| <b>3</b>              | B3LYP/6-31+G(d) | Global Min. | -1260.569402  | -1260.987286  |
| <b>3<sup>-</sup></b>  | B3LYP/6-31+G(d) | Global Min. | -1260.557420  | -1260.971240  |
| <b>9</b>              | B3LYP/6-31+G(d) | Global Min. | -1069.246902  | -1068.883119  |
| <b>9<sup>-</sup></b>  | B3LYP/6-31+G(d) | Global Min. | -1069.227136  | -1068.865497  |

**Tab. 2** Standard orientation of **1** [global minimum, B3LYP/6-31+G(d)].

| atomic symbol | x             | y             | z             |
|---------------|---------------|---------------|---------------|
| Si            | 0.3031228494  | -0.3953201432 | 0.1120742207  |
| C             | 0.1031566784  | 1.4876478657  | 0.2054422091  |
| Si            | -1.8963989169 | -1.3168159805 | -0.010492906  |
| C             | -2.7649553234 | -0.6724306176 | -1.5753692863 |
| C             | -2.8538164339 | -0.7336697608 | 1.5235305929  |
| N             | 2.3355431914  | -0.0108607956 | -1.9627734664 |
| C             | -1.9208948812 | -3.221130153  | -0.0474814947 |
| C             | 2.8749044555  | -0.4867688671 | -3.2418870382 |
| C             | 3.4045759024  | 0.2149832723  | -0.9873843907 |
| C             | 4.4345779596  | 1.2283770371  | -1.4991611989 |
| C             | 1.2897781949  | -0.9099074646 | -1.4683564331 |
| C             | 3.8774669031  | 0.5048498061  | -3.8403675635 |
| C             | 5.0142575555  | 0.7974304853  | -2.8524547799 |

|   |               |               |               |
|---|---------------|---------------|---------------|
| C | 0.0566015274  | 2.2836007597  | -0.9568220511 |
| C | -0.142101176  | 3.665282023   | -0.8836076235 |
| C | -0.2977605428 | 4.287919567   | 0.3583089128  |
| C | -0.0567817696 | 2.1376842667  | 1.4450445695  |
| C | -0.2526894395 | 3.5195308206  | 1.5245593057  |
| C | -3.7934523208 | 0.3124411587  | 1.4507825907  |
| C | -4.4682277064 | 0.7691866544  | 2.5874663943  |
| C | -4.2159523405 | 0.1879843854  | 3.8323209375  |
| C | -2.9873424664 | -3.9459308125 | 0.5201374318  |
| C | -3.0453061206 | -5.3405886285 | 0.4423436998  |
| C | -2.0326768721 | -6.0499517021 | -0.2090400998 |
| C | -0.9642387027 | -5.3545893973 | -0.7812337308 |
| C | -0.913161813  | -3.9600055459 | -0.6979471049 |
| C | -3.2872657221 | -0.8528316937 | 3.9314395285  |
| C | -2.6175539272 | -1.303777481  | 2.7910638937  |
| C | 1.1582185771  | -1.0401329608 | 1.6848918306  |
| H | -3.8221036151 | -0.9664625427 | -1.5871293567 |
| H | -2.2969174734 | -1.0952509672 | -2.4728645493 |
| H | -2.7107545081 | 0.4199379534  | -1.6552068653 |
| H | 2.035109405   | -0.6350730962 | -3.9316226681 |
| H | 3.3658874007  | -1.4768415049 | -3.1142055401 |
| H | 3.9161565897  | -0.7409882021 | -0.7378277014 |
| H | 2.9555920818  | 0.5914515298  | -0.0629095819 |
| H | 5.2312362955  | 1.3396014069  | -0.7518998533 |
| H | 3.9444117057  | 2.2059135386  | -1.6001991314 |
| H | 0.5618120215  | -1.0348634941 | -2.2815824732 |
| H | 1.6967388064  | -1.9289630292 | -1.2773222515 |
| H | 4.272274431   | 0.096982688   | -4.7802816368 |
| H | 3.3509300154  | 1.4375161182  | -4.0850079095 |
| H | 5.6844083825  | 1.5704568149  | -3.2503016218 |
| H | 5.6226574987  | -0.1100202419 | -2.7177561705 |
| H | 0.2038992682  | 1.8247430469  | -1.9309221109 |
| H | -0.1688549929 | 4.2561597988  | -1.796549712  |
| H | -0.4498631865 | 5.3631308262  | 0.4166866945  |
| H | -0.0313948594 | 1.5625498899  | 2.3681093334  |
| H | -0.3721516197 | 3.9937647391  | 2.4960372555  |
| H | -4.0080464681 | 0.7840911691  | 0.4945204282  |
| H | -5.1896196598 | 1.5783265328  | 2.4991948024  |
| H | -4.7396560401 | 0.5403908188  | 4.7177404067  |
| H | -3.7845345338 | -3.4169869136 | 1.0374555957  |
| H | -3.8808646924 | -5.8722669366 | 0.8920230207  |
| H | -2.0749797261 | -7.1348531515 | -0.2688121893 |
| H | -0.1697374718 | -5.8964016644 | -1.289402936  |
| H | -0.0680617557 | -3.4457540758 | -1.1508939283 |
| H | -3.0869396371 | -1.3151748651 | 4.8954062221  |

|   |               |               |              |
|---|---------------|---------------|--------------|
| H | -1.9064759643 | -2.1218228213 | 2.8915014894 |
| H | 1.3413007956  | -2.1189027167 | 1.6029829186 |
| H | 0.5335823701  | -0.8820657399 | 2.5719833551 |
| H | 2.1225318167  | -0.5496310063 | 1.8634297152 |

**Tab. 3** Standard orientation of  $1^+$  [global minimum, B3LYP/6-31+G(d)].

| atomic symbol | x             | y             | z             |
|---------------|---------------|---------------|---------------|
| Si            | -0.4528690306 | -0.3928116156 | 0.4294268101  |
| C             | -1.1185020297 | -2.0572877357 | -0.1170828141 |
| Si            | 1.6407309409  | 0.2857124299  | -0.6281195502 |
| C             | 1.4311156496  | -0.1851770911 | -2.4653205697 |
| C             | 3.121542325   | -0.6628912874 | 0.0704795466  |
| N             | -3.1329036513 | 0.8238095517  | 0.0470162634  |
| C             | 1.9321153373  | 2.1367808611  | -0.5029115319 |
| C             | -3.860631569  | 2.0385406118  | -0.3192728981 |
| C             | -3.6169058615 | 0.2759219034  | 1.311797835   |
| C             | -5.1147406765 | -0.0483610152 | 1.2482115193  |
| C             | -1.6795778397 | 1.0514414625  | 0.0199095149  |
| C             | -5.3669158977 | 1.7849701797  | -0.452904655  |
| C             | -5.935333654  | 1.1820008028  | 0.8387364931  |
| C             | -2.0940369917 | -2.1975266289 | -1.145953031  |
| C             | -2.4704821026 | -3.4428167686 | -1.6400926085 |
| C             | -1.8867832775 | -4.624340946  | -1.1397084248 |
| C             | -0.5518964376 | -3.2697215196 | 0.3779838483  |
| C             | -0.9259578287 | -4.5157726933 | -0.1188224968 |
| C             | 3.8888605217  | -1.5327522784 | -0.7428794518 |
| C             | 4.9801842931  | -2.2456208183 | -0.2468016738 |
| C             | 5.355908009   | -2.123397898  | 1.1019080523  |
| C             | 2.6492468517  | 2.7592677722  | 0.5589366269  |
| C             | 2.7915467904  | 4.1393553862  | 0.6523164586  |
| C             | 2.2145481991  | 4.9929103858  | -0.3120065043 |
| C             | 1.503139418   | 4.4089450026  | -1.3738078294 |
| C             | 1.3649320612  | 3.0258920123  | -1.4672083145 |
| C             | 4.6046205389  | -1.2847551141 | 1.9363888576  |
| C             | 3.507389952   | -0.5828475256 | 1.4353776756  |
| C             | -0.1560719127 | -0.4212895221 | 2.3208687376  |
| H             | 2.3128755707  | 0.0869616299  | -3.060570543  |
| H             | 0.5628831001  | 0.3223338448  | -2.9043652926 |
| H             | 1.2536776191  | -1.2626348483 | -2.5679736492 |
| H             | -3.4554096821 | 2.4058525295  | -1.270077164  |
| H             | -3.6887297213 | 2.8437772592  | 0.4313240638  |
| H             | -3.4285279763 | 0.9853861703  | 2.1502321395  |
| H             | -3.054978217  | -0.6376938898 | 1.5253958724  |
| H             | -5.4451185614 | -0.4274621072 | 2.2253685285  |

|   |               |               |               |
|---|---------------|---------------|---------------|
| H | -5.2660559964 | -0.8548655269 | 0.5180643985  |
| H | -1.4346620042 | 1.4127028588  | -0.9877004944 |
| H | -1.3990708315 | 1.8880834755  | 0.6969353412  |
| H | -5.8753478857 | 2.7278017722  | -0.7001701567 |
| H | -5.5370199629 | 1.09216429    | -1.2888944675 |
| H | -6.9955888907 | 0.920366749   | 0.7133183635  |
| H | -5.8871148037 | 1.9351337117  | 1.6410749356  |
| H | -2.576206205  | -1.3062114818 | -1.5419594614 |
| H | -3.2295090628 | -3.50191524   | -2.4201387693 |
| H | -2.1750056499 | -5.5973840818 | -1.5316962614 |
| H | 0.2009394499  | -3.2302323856 | 1.164204199   |
| H | -0.464498687  | -5.414788228  | 0.2893525944  |
| H | 3.6308482553  | -1.65044293   | -1.7931472064 |
| H | 5.5426162409  | -2.8998452222 | -0.9115572455 |
| H | 6.2062402661  | -2.677800742  | 1.4934886416  |
| H | 3.1250091504  | 2.1415270484  | 1.317255285   |
| H | 3.3614375784  | 4.562167696   | 1.4794148373  |
| H | 2.3178950824  | 6.0730081544  | -0.2354641587 |
| H | 1.0539835126  | 5.0426464621  | -2.1386522618 |
| H | 0.8137931364  | 2.6205616122  | -2.3142824913 |
| H | 4.8685448909  | -1.1875011819 | 2.9888141215  |
| H | 2.9311783918  | 0.0318151163  | 2.1235051405  |
| H | 0.2263330882  | 0.5498486336  | 2.6626913541  |
| H | 0.5890847157  | -1.1790438818 | 2.5908882535  |
| H | -1.0734316492 | -0.6396461858 | 2.8825622446  |

**Tab. 4** Standard orientation of **8** [global minimum, B3LYP/6-31+G(d)].

| atomic symbol | x             | y             | z             |
|---------------|---------------|---------------|---------------|
| Si            | -0.2440031583 | 0.2363965553  | -0.1751565416 |
| C             | -0.3009881089 | 2.1360953291  | -0.2503434625 |
| Si            | -2.445420947  | -0.6612803256 | -0.2062201391 |
| C             | -3.2990150887 | -0.2770584874 | -1.8647492913 |
| C             | -3.4826614301 | 0.1116026826  | 1.1908175904  |
| N             | 2.0013226527  | 0.132602039   | -2.0003310886 |
| C             | -2.3921064535 | -2.54675335   | 0.0390050383  |
| C             | 2.3354403031  | 0.1604454221  | -3.4298091333 |
| C             | 3.013396771   | -0.6163107168 | -1.2495666578 |
| C             | 4.4058309223  | 0.0053154677  | -1.4018855633 |
| C             | 0.6447377024  | -0.3863141026 | -1.7646467256 |
| C             | 3.6993775487  | 0.8138198987  | -3.6770509332 |
| C             | 4.803950321   | 0.1061497913  | -2.8804476502 |
| H             | -0.847504507  | 2.4948355524  | -1.1316193467 |
| H             | 0.7173120362  | 2.5403003161  | -0.3092289082 |
| H             | -0.7836317918 | 2.5606709597  | 0.6387838076  |

|   |               |               |               |
|---|---------------|---------------|---------------|
| H | -4.4829285627 | -0.3390021563 | 1.2311555603  |
| H | -3.6097881649 | 1.1885617682  | 1.0235178994  |
| H | -3.0208612189 | -0.0126349475 | 2.1777942378  |
| C | -2.5863482201 | -3.1313642367 | 1.305695245   |
| C | -2.5194333142 | -4.5157448872 | 1.4920149365  |
| C | -2.2541930717 | -5.3563443339 | 0.4079141524  |
| C | -2.05918427   | -4.8019465898 | -0.8604468978 |
| C | -2.1267038382 | -3.4172134131 | -1.0370198563 |
| C | 0.6110784367  | -0.2767215731 | 1.4475902986  |
| H | -4.3283031767 | -0.6584318803 | -1.8713201148 |
| H | -2.7749306667 | -0.7234732485 | -2.7184547041 |
| H | -3.3428180627 | 0.8058904239  | -2.0374545384 |
| H | 1.5535402339  | 0.7233698002  | -3.952789458  |
| H | 2.3344927468  | -0.8683069549 | -3.8528161373 |
| H | 3.0431775942  | -1.6747600991 | -1.5918253172 |
| H | 2.7253957258  | -0.6353887829 | -0.1951226473 |
| H | 5.1342794824  | -0.5975524401 | -0.8436152067 |
| H | 4.398334698   | 1.0072719872  | -0.9512305093 |
| H | 0.0078753704  | -0.0245026029 | -2.5846785246 |
| H | 0.6168551919  | -1.4937710522 | -1.8364563558 |
| H | 3.9212837442  | 0.7930582     | -4.752299892  |
| H | 3.6441651482  | 1.868910356   | -3.3758563275 |
| H | 5.7596877325  | 0.6349090354  | -2.9900148844 |
| H | 4.95370328    | -0.9060156827 | -3.2860896259 |
| H | -2.7996583838 | -2.5013735771 | 2.166737043   |
| H | -2.6763778179 | -4.9365050764 | 2.482722184   |
| H | -2.2024726849 | -6.4332466021 | 0.5490231694  |
| H | -1.8558383882 | -5.4472596918 | -1.7120959588 |
| H | -1.974110888  | -3.0137776829 | -2.0364384661 |
| H | 0.7900489601  | -1.3576492051 | 1.4923011056  |
| H | -0.0171965818 | -0.0110966363 | 2.3078539987  |
| H | 1.5724921939  | 0.2349947503  | 1.5800545969  |

**Tab. 5** Standard orientation of  $\mathbf{8}^+$  [global minimum, B3LYP/6-31+G(d)].

| atomic symbol | x             | y             | z             |
|---------------|---------------|---------------|---------------|
| Si            | 0.0179382392  | -0.0244233883 | 0.1866192386  |
| C             | 0.2381490814  | 1.8633509248  | 0.0124328564  |
| Si            | -2.2409013992 | -0.7640601974 | 0.0657128862  |
| C             | -3.0536241378 | -0.0267160813 | -1.4951264764 |
| C             | -3.1914771178 | -0.1510102333 | 1.6032928808  |
| N             | 2.1143305671  | -0.275864866  | -1.8509286952 |
| C             | -2.2707019588 | -2.6411561296 | -0.0246426086 |
| C             | 2.4704903242  | -0.865522467  | -3.1422287783 |
| C             | 3.2488227035  | -0.301742257  | -0.9302768194 |

|   |               |               |               |
|---|---------------|---------------|---------------|
| C | 4.4592795665  | 0.4492777384  | -1.4974997283 |
| C | 0.9065847604  | -0.9033376527 | -1.2898087228 |
| C | 3.6403187238  | -0.127373036  | -3.8015488725 |
| C | 4.861188889   | -0.0977512498 | -2.8730345837 |
| H | -0.148778411  | 2.2261446962  | -0.9491853752 |
| H | 1.3011230142  | 2.14521385    | 0.0721072794  |
| H | -0.2951863557 | 2.3942743974  | 0.8120069553  |
| H | -4.2421503955 | -0.4721958418 | 1.5640050307  |
| H | -3.1714004598 | 0.9472630227  | 1.6535875639  |
| H | -2.756740383  | -0.5302151    | 2.5386198829  |
| C | -2.0573065619 | -3.4444896873 | 1.1336759515  |
| C | -2.0191199423 | -4.8348499187 | 1.0706031978  |
| C | -2.1871146824 | -5.503436913  | -0.1561305622 |
| C | -2.3517288519 | -4.7325560746 | -1.3242551627 |
| C | -2.3908761512 | -3.3424083671 | -1.2570548154 |
| C | 0.7667235565  | -0.5769212602 | 1.8568068071  |
| H | -4.0862606405 | -0.3856796955 | -1.6044539381 |
| H | -2.5083492451 | -0.2813273026 | -2.41514992   |
| H | -3.0829562341 | 1.0689962941  | -1.4252836125 |
| H | 1.5868709351  | -0.8209215387 | -3.7919563629 |
| H | 2.7305010636  | -1.9424286783 | -3.0288633433 |
| H | 3.5413793584  | -1.3499810702 | -0.6932268661 |
| H | 2.9442053612  | 0.1603162779  | 0.0148028526  |
| H | 5.2959910395  | 0.374112081   | -0.7880821918 |
| H | 4.2034442222  | 1.5142972772  | -1.5845406947 |
| H | 0.1663046136  | -0.9406797889 | -2.1016120732 |
| H | 1.0939346577  | -1.9648531699 | -1.0185462264 |
| H | 3.8875085062  | -0.6148243665 | -4.7560519014 |
| H | 3.3256912058  | 0.9001855434  | -4.0307846638 |
| H | 5.6701446096  | 0.5059224447  | -3.310465165  |
| H | 5.2540966667  | -1.1200330161 | -2.7588034612 |
| H | -1.9341529376 | -2.9659531261 | 2.1047706126  |
| H | -1.8664199665 | -5.4083290755 | 1.9845877469  |
| H | -2.1736602833 | -6.5901451648 | -0.2040042807 |
| H | -2.4608516512 | -5.2257798604 | -2.289718855  |
| H | -2.5330223855 | -2.7832941434 | -2.1810581882 |
| H | 0.7758804382  | -1.6723421127 | 1.9472085747  |
| H | 0.1744007246  | -0.1795146811 | 2.6916202999  |
| H | 1.7964773237  | -0.2176370359 | 1.9898623274  |

---

**Tab. 6** Standard orientation of **4** [global minimum, B3LYP/6-31+G(d)].

| atomic symbol | x             | y             | z             |
|---------------|---------------|---------------|---------------|
| Si            | 0.1788719554  | -0.205713627  | 0.1302657184  |
| C             | -0.0331465067 | 1.6794478932  | 0.0773861979  |
| Si            | -1.9814822772 | -1.1984536555 | 0.0205945493  |
| C             | -2.8848822863 | -0.5389754824 | -1.5321918438 |
| C             | -2.9666493604 | -0.6232302001 | 1.5577161756  |
| N             | 2.2785091318  | -0.0089029432 | -1.9094032118 |
| Si            | -1.9901626092 | -3.5738963579 | -0.0449849694 |
| C             | 2.8460288109  | -0.5956568096 | -3.1286104284 |
| C             | 3.3212100784  | 0.2732250696  | -0.9207868394 |
| C             | 4.387125796   | 1.2230639237  | -1.4786637729 |
| C             | 1.1935560878  | -0.8405964635 | -1.3825593116 |
| C             | 3.8893798946  | 0.3235083916  | -3.7716043035 |
| C             | 5.000486374   | 0.6732717829  | -2.7726675909 |
| C             | -0.0377036406 | 2.3905838869  | -1.1392333353 |
| C             | -0.2504173341 | 3.7717615895  | -1.1733239296 |
| C             | -0.4643762365 | 4.4800065187  | 0.0127007639  |
| C             | -0.2491998722 | 2.4157583794  | 1.2593947632  |
| C             | -0.4611483652 | 3.797432177   | 1.2321889621  |
| C             | -3.7925984096 | -4.1917005685 | -0.0024846111 |
| C             | -1.0727873256 | -4.3217316491 | 1.4468337168  |
| C             | -1.179546197  | -4.2284407061 | -1.6389361029 |
| C             | 1.0121816012  | -0.6942120303 | 1.7734616915  |
| H             | -3.9218745134 | -0.8979341829 | -1.5600498876 |
| H             | -2.3984481393 | -0.8619219036 | -2.4608821227 |
| H             | -2.9124162599 | 0.5577797013  | -1.5351028685 |
| H             | -4.0022199306 | -0.9847530166 | 1.5158055961  |
| H             | -2.9999187008 | 0.4720591022  | 1.6147233317  |
| H             | -2.5243665549 | -0.9932828377 | 2.4909413064  |
| H             | 2.0242495632  | -0.7808582009 | -3.8309847937 |
| H             | 3.309115368   | -1.5827040868 | -2.9074702128 |
| H             | 3.8054751057  | -0.6687823923 | -0.5798821012 |
| H             | 2.8526067821  | 0.7303210353  | -0.0437201027 |
| H             | 5.1622858325  | 1.3810305351  | -0.7172408464 |
| H             | 3.9202873034  | 2.1976725609  | -1.6747812275 |
| H             | 0.4798312758  | -0.9971203237 | -2.2032967068 |
| H             | 1.5587736759  | -1.8593190129 | -1.1168027604 |
| H             | 4.3045765943  | -0.1678276902 | -4.6615252005 |
| H             | 3.3923949049  | 1.2434111052  | -4.1089196006 |
| H             | 5.7000073081  | 1.398334603   | -3.2084113239 |
| H             | 5.5834167831  | -0.2322724657 | -2.5450727866 |
| H             | 0.1536354057  | 1.86422707    | -2.0705325291 |
| H             | -0.2426592729 | 4.2959661505  | -2.1264329023 |
| H             | -0.6282283928 | 5.5547269184  | -0.0128533951 |



|   |               |               |               |
|---|---------------|---------------|---------------|
| H | -0.2484968606 | 1.9093894207  | 2.2227991135  |
| H | -0.6222370977 | 4.3391594995  | 2.161582128   |
| H | -4.3714915397 | -3.815927225  | -0.8554756418 |
| H | -4.308421608  | -3.8779313544 | 0.913535919   |
| H | -3.823890913  | -5.2892608016 | -0.039983948  |
| H | -1.4909044103 | -3.9741477961 | 2.3998750881  |
| H | -0.0060623092 | -4.0659666757 | 1.4395947741  |
| H | -1.1493026592 | -5.4174530033 | 1.4329448352  |
| H | -0.1234501358 | -3.940657066  | -1.7097332037 |
| H | -1.6876879016 | -3.8520751743 | -2.5355978306 |
| H | -1.2267629183 | -5.3254879572 | -1.6692189746 |
| H | 0.342702316   | -0.5295291643 | 2.6265420558  |
| H | 1.9305824455  | -0.1246162453 | 1.958216792   |
| H | 1.2751501443  | -1.7591982448 | 1.7707177387  |

**Tab. 7** Standard orientation of  $4^+$  [global minimum, B3LYP/6-31+G(d)].

| atomic symbol | x             | y             | z             |
|---------------|---------------|---------------|---------------|
| Si            | 0.122798125   | -0.0357816729 | 0.1104865857  |
| C             | 0.0488062984  | 1.8276858261  | 0.0913614631  |
| Si            | -1.9609802412 | -1.2471540457 | 0.0057184347  |
| C             | -2.9132072209 | -0.5916726164 | -1.5323081803 |
| C             | -2.9584813458 | -0.6815596713 | 1.5519319377  |
| N             | 2.2655578102  | 0.0295131248  | -1.9420097814 |
| Si            | -2.0711463194 | -3.6351675093 | -0.0593171976 |
| C             | 2.8506797     | -0.6432243276 | -3.0988954817 |
| C             | 3.2786366351  | 0.3425244534  | -0.937869737  |
| C             | 4.3840664158  | 1.2353324534  | -1.5142665978 |
| C             | 1.1221503208  | -0.7197380852 | -1.4067840505 |
| C             | 3.9380872282  | 0.2080895589  | -3.7656462415 |
| C             | 5.0251119189  | 0.5972231754  | -2.753801942  |
| C             | 0.0017269747  | 2.5860284286  | -1.1237523944 |
| C             | -0.2222455474 | 3.9564999188  | -1.1318640088 |
| C             | -0.4180633123 | 4.6712284909  | 0.0710900628  |
| C             | -0.1245375527 | 2.5843466528  | 1.2962298156  |
| C             | -0.3481858745 | 3.9554344494  | 1.2863169467  |
| C             | -3.7984504822 | -4.4797915764 | -0.0212497179 |
| C             | -1.1092884277 | -4.3798392978 | 1.4216694527  |
| C             | -1.2161139595 | -4.2987386945 | -1.6400622024 |
| C             | 0.9672714108  | -0.6017627186 | 1.7375271095  |
| H             | -3.9617303713 | -0.9172019742 | -1.5194590633 |
| H             | -2.4672342076 | -0.9468396392 | -2.4715606951 |
| H             | -2.8964365871 | 0.5060397781  | -1.5496345792 |
| H             | -4.0015285617 | -1.0200603571 | 1.4979501176  |
| H             | -2.9592972276 | 0.413982813   | 1.626913578   |

|   |               |               |               |
|---|---------------|---------------|---------------|
| H | -2.527241739  | -1.0802111254 | 2.4804679998  |
| H | 2.0467254809  | -0.8533665421 | -3.8152527787 |
| H | 3.2833611988  | -1.6290737996 | -2.807140548  |
| H | 3.733749303   | -0.5896922377 | -0.5292417072 |
| H | 2.7869026817  | 0.8580066478  | -0.1087648222 |
| H | 5.1408065479  | 1.4220697664  | -0.739465125  |
| H | 3.9434759052  | 2.2051587877  | -1.7809827096 |
| H | 0.4052451329  | -0.8414306128 | -2.2311354834 |
| H | 1.4256316477  | -1.7560303621 | -1.1305966443 |
| H | 4.3713733143  | -0.3474990523 | -4.6097814829 |
| H | 3.4736556375  | 1.1163866365  | -4.1739153008 |
| H | 5.7561125109  | 1.2790005385  | -3.211174532  |
| H | 5.5789829883  | -0.3062803869 | -2.4528419958 |
| H | 0.1665484229  | 2.0766936214  | -2.0718972879 |
| H | -0.2377445409 | 4.4883542561  | -2.0840246906 |
| H | -0.6017547056 | 5.7433079877  | 0.0621869989  |
| H | -0.0818342965 | 2.0740111499  | 2.2587337415  |
| H | -0.4679022478 | 4.4838862604  | 2.2329130181  |
| H | -4.4131469835 | -4.1782157047 | -0.8791301079 |
| H | -4.3550298413 | -4.2223144467 | 0.889273243   |
| H | -3.6950316623 | -5.580967911  | -0.0520114573 |
| H | -1.5338842007 | -4.0578270802 | 2.3816775922  |
| H | -0.052794813  | -4.0828004003 | 1.4109607118  |
| H | -1.1521735316 | -5.4783541219 | 1.3929585963  |
| H | -0.1654615255 | -3.9876769996 | -1.6982650744 |
| H | -1.7194291    | -3.9415856676 | -2.547997526  |
| H | -1.2448666628 | -5.3981083327 | -1.6567196956 |
| H | 0.3015153885  | -0.4603433501 | 2.5986291183  |
| H | 1.8929898567  | -0.048044052  | 1.9410623406  |
| H | 1.2127542348  | -1.6708504038 | 1.6911619759  |

**Tab. 8** Standard orientation of **10** [global minimum, B3LYP/6-31+G(d)].

| atomic symbol | x             | y             | z             |
|---------------|---------------|---------------|---------------|
| Si            | -0.1178854713 | 0.1315880124  | 0.0328558462  |
| C             | -0.0829648283 | 2.0276130536  | -0.0312488388 |
| Si            | -2.3809862198 | -0.6037506085 | -0.0552352652 |
| C             | -3.235595799  | 0.0870545281  | -1.6065299745 |
| C             | -3.3254045041 | 0.009290641   | 1.4776927796  |
| N             | 1.959256657   | -0.0025157483 | -2.0396111916 |
| C             | -2.439791767  | -2.5048247913 | -0.1037071766 |
| C             | 2.3958668652  | -0.6672941224 | -3.2731499354 |
| C             | 3.0542776677  | 0.087850203   | -1.0716888413 |
| C             | 4.2591010383  | 0.8438354176  | -1.64434148   |
| C             | 0.7638861353  | -0.651349491  | -1.4919657831 |

|   |               |               |               |
|---|---------------|---------------|---------------|
| C | 3.5684378122  | 0.0663250235  | -3.9316702283 |
| C | 4.7429933296  | 0.2096179532  | -2.9549550493 |
| C | 0.0846356128  | 2.725436562   | -1.2440880714 |
| C | 0.0461473162  | 4.1223412363  | -1.2899888679 |
| C | -0.1589003479 | 4.8591484744  | -0.1202046665 |
| C | -0.2841063642 | 2.7927495976  | 1.1353503876  |
| C | -0.3212114433 | 4.1895394642  | 1.0960254781  |
| H | -4.3687972641 | -0.3307689433 | 1.4509464848  |
| H | -3.3310216596 | 1.1057699346  | 1.5103901851  |
| H | -2.8838502021 | -0.3456853278 | 2.4166651599  |
| C | -2.5039069792 | -3.2683864205 | 1.0786597274  |
| C | -2.5184572638 | -4.6660371384 | 1.0486253184  |
| C | -2.4665434578 | -5.3405098854 | -0.1743401714 |
| C | -2.4029153862 | -4.606873943  | -1.3622318894 |
| C | -2.3888116742 | -3.2096566221 | -1.3225715104 |
| C | 0.6470598836  | -0.4682679787 | 1.6708725243  |
| H | -4.2821832356 | -0.2409445847 | -1.6517985095 |
| H | -2.7477001815 | -0.2310807563 | -2.5356792791 |
| H | -3.2255355499 | 1.1837637399  | -1.5916272332 |
| H | 1.5420324064  | -0.7034862778 | -3.9608511064 |
| H | 2.6872513632  | -1.7205888668 | -3.0665236855 |
| H | 3.3741987936  | -0.9262908865 | -0.7448768495 |
| H | 2.6880464258  | 0.611473943   | -0.1829962925 |
| H | 5.0636428115  | 0.8560088339  | -0.8972748158 |
| H | 3.9667538507  | 1.8872380341  | -1.8241183737 |
| H | 0.0207786787  | -0.6904424567 | -2.3006634088 |
| H | 0.9629263915  | -1.7146706305 | -1.23081937   |
| H | 3.8754487779  | -0.4794492325 | -4.8336720004 |
| H | 3.230420723   | 1.0613611145  | -4.2521316304 |
| H | 5.5479474903  | 0.8081592508  | -3.4007929948 |
| H | 5.1659525628  | -0.7848424439 | -2.7459077467 |
| H | 0.2752584842  | 2.1720018944  | -2.159624238  |
| H | 0.1826562619  | 4.6351201661  | -2.2395743064 |
| H | -0.1878655949 | 5.9456600033  | -0.1548754305 |
| H | -0.4110086758 | 2.2966084579  | 2.0959359682  |
| H | -0.4759383615 | 4.7536140019  | 2.0131110595  |
| H | -2.5511571642 | -2.7690082546 | 2.0443506191  |
| H | -2.5722343051 | -5.2270187572 | 1.978967626   |
| H | -2.4786441868 | -6.4274363426 | -0.2015172665 |
| H | -2.3659131895 | -5.1219168026 | -2.3195398805 |
| H | -2.3433436112 | -2.6638189791 | -2.2628815081 |
| H | 0.717367228   | -1.5630053353 | 1.6799758546  |
| H | 0.0315645842  | -0.1752545358 | 2.5303361867  |
| H | 1.6533655363  | -0.0651933776 | 1.8340136621  |

---

**Tab. 9** Standard orientation of  $10^-$  [global minimum, B3LYP/6-31+G(d)].

| atomic symbol | x             | y             | z             |
|---------------|---------------|---------------|---------------|
| Si            | -0.0280214454 | 0.079600749   | 0.0050356719  |
| C             | 0.0840629181  | 1.9453158241  | -0.0069804056 |
| Si            | -2.2499238148 | -0.8663538457 | -0.0106116475 |
| C             | -3.2037553635 | -0.056032571  | -1.4564972027 |
| C             | -3.088532626  | -0.2988149449 | 1.6133645688  |
| N             | 1.979586353   | -0.037850347  | -2.1732550113 |
| C             | -2.396276193  | -2.7297422471 | -0.1505056474 |
| C             | 2.4366084435  | -0.7671484756 | -3.3540588058 |
| C             | 3.0770348423  | 0.1977949183  | -1.23900313   |
| C             | 4.2121805763  | 0.9932416844  | -1.8958736783 |
| C             | 0.814299025   | -0.6923780127 | -1.5611795772 |
| C             | 3.5428465507  | -0.0120870142 | -4.10104777   |
| C             | 4.7202931384  | 0.2970736065  | -3.1660082002 |
| C             | 0.0078058551  | 2.7066635163  | -1.2158322906 |
| C             | -0.076785703  | 4.0939962894  | -1.2116562763 |
| C             | -0.0936385391 | 4.8178363263  | -0.0001512696 |
| C             | 0.0835945023  | 2.7069306264  | 1.2035871472  |
| C             | -0.0005600352 | 4.0950878898  | 1.2076616435  |
| H             | -4.1500848319 | -0.5821403664 | 1.6240766581  |
| H             | -3.0228143008 | 0.7919061213  | 1.7181852119  |
| H             | -2.6171451632 | -0.7440633496 | 2.4988787396  |
| C             | -2.283021645  | -3.588654112  | 0.9868899921  |
| C             | -2.2472190737 | -4.9738366177 | 0.8732699829  |
| C             | -2.3154480959 | -5.5989763759 | -0.3899491755 |
| C             | -2.4394313244 | -4.7789082957 | -1.5309920944 |
| C             | -2.4759418361 | -3.3938294861 | -1.4142580048 |
| C             | 0.8263839917  | -0.5944095664 | 1.5821442187  |
| H             | -4.2567561102 | -0.3700653785 | -1.4562897974 |
| H             | -2.7796393589 | -0.3172040151 | -2.4347498244 |
| H             | -3.1693540549 | 1.0372098648  | -1.3671000917 |
| H             | 1.5753231846  | -0.9211738233 | -4.0159429669 |
| H             | 2.8077725563  | -1.7804586373 | -3.0745357976 |
| H             | 3.479907132   | -0.7649658186 | -0.8472938834 |
| H             | 2.6845980827  | 0.7592123315  | -0.3866328382 |
| H             | 5.0292602862  | 1.1242844475  | -1.1725808559 |
| H             | 3.8348873823  | 1.9936807425  | -2.1467726138 |
| H             | 0.0425794154  | -0.7590403584 | -2.341084288  |
| H             | 1.0463278686  | -1.747830199  | -1.2958445704 |
| H             | 3.8751960904  | -0.6085537383 | -4.9628489923 |
| H             | 3.1276679415  | 0.9271351236  | -4.4923197218 |
| H             | 5.4716440464  | 0.9159335996  | -3.6769687171 |
| H             | 5.2199607728  | -0.6450917443 | -2.8899898353 |
| H             | 0.0377562667  | 2.1873228465  | -2.1721919155 |

|   |               |               |               |
|---|---------------|---------------|---------------|
| H | -0.1223707871 | 4.6288334149  | -2.1608150101 |
| H | -0.1668468268 | 5.9031691466  | 0.002007606   |
| H | 0.1532925054  | 2.1900833016  | 2.1606646049  |
| H | 0.0093253596  | 4.6286468124  | 2.158608883   |
| H | -2.229566267  | -3.1500377283 | 1.9832683153  |
| H | -2.1699190562 | -5.5826810881 | 1.7745685256  |
| H | -2.2804534409 | -6.6823473613 | -0.4805510155 |
| H | -2.5134782164 | -5.2344250667 | -2.5189396295 |
| H | -2.5773390561 | -2.801118151  | -2.3231864599 |
| H | 0.8792299713  | -1.690053763  | 1.5416408545  |
| H | 0.2582406368  | -0.3312337829 | 2.4838020483  |
| H | 1.8458574699  | -0.2074529009 | 1.7086443397  |

**Tab. 10** Standard orientation of **3** [global minimum, B3LYP/6-31+G(d)].

| atomic symbol | x             | y             | z             |
|---------------|---------------|---------------|---------------|
| Si            | 0.0348412909  | -0.066759064  | 0.1593340107  |
| C             | 0.0818823891  | 1.8295860739  | 0.0985478619  |
| Si            | -2.2121088147 | -0.8092755937 | -0.0657819057 |
| C             | -2.9828113426 | -0.1172589723 | -1.661755614  |
| C             | -3.2517145256 | -0.2185013877 | 1.4148397317  |
| N             | 2.2369094997  | -0.197504168  | -1.7858455679 |
| C             | -2.2800733945 | -2.7125318124 | -0.1293640218 |
| C             | 2.7643892216  | -0.8844416467 | -2.9708005241 |
| C             | 3.2643242722  | -0.0579323438 | -0.7518570886 |
| C             | 4.4870362334  | 0.7087432038  | -1.2691384774 |
| C             | 1.0173120739  | -0.8518685439 | -1.3036474954 |
| C             | 3.9632404719  | -0.1452152396 | -3.5735484436 |
| C             | 5.0677358201  | 0.0498182661  | -2.5268673317 |
| C             | 0.3087816251  | 2.5287193831  | -1.1036568374 |
| C             | 0.277541449   | 3.9257926565  | -1.1487104064 |
| C             | 0.0191679416  | 4.6615048341  | 0.0112836354  |
| C             | -0.1730828526 | 2.5934555478  | 1.2552615795  |
| C             | -0.2043256817 | 3.9904505219  | 1.2169116275  |
| C             | 0.7101242987  | -0.6689485286 | 1.8381295568  |
| H             | -4.0322308607 | -0.4297759909 | -1.7491059459 |
| H             | -2.4582533335 | -0.4723499413 | -2.5578296453 |
| H             | -2.9584522063 | 0.9791593075  | -1.6753809294 |
| H             | -4.2929808909 | -0.5520652972 | 1.30882956    |
| H             | -3.2606536094 | 0.8756576771  | 1.492152987   |
| H             | -2.8733616681 | -0.6181256322 | 2.3641163508  |
| H             | -3.3184566003 | -3.0582559242 | -0.223848433  |
| H             | -1.8633083311 | -3.1631337921 | 0.7801967235  |
| H             | -1.7201072489 | -3.1119997897 | -0.9842712498 |
| H             | 1.9569246857  | -0.9565504322 | -3.7096066485 |

|   |               |               |               |
|---|---------------|---------------|---------------|
| H | 3.0624694352  | -1.925736999  | -2.7173064056 |
| H | 3.5828777918  | -1.0556073618 | -0.3765376516 |
| H | 2.8308803582  | 0.4825604806  | 0.0954848276  |
| H | 5.2416281314  | 0.7613070381  | -0.4733145876 |
| H | 4.1833994368  | 1.739165502   | -1.498007625  |
| H | 0.3251600734  | -0.9076547476 | -2.1557727902 |
| H | 1.2131981076  | -1.9110288669 | -1.0187456359 |
| H | 4.3390387928  | -0.7097910083 | -4.4371152796 |
| H | 3.6281336042  | 0.8329992554  | -3.9446360609 |
| H | 5.8879334198  | 0.6536627348  | -2.9363359063 |
| H | 5.496618927   | -0.9290036789 | -2.2629369206 |
| H | 0.5390920264  | 1.9757547759  | -2.0101897803 |
| H | 0.4611138765  | 4.4398882904  | -2.0896373345 |
| H | -0.0039449572 | 5.7481807029  | -0.0228312751 |
| H | -0.3485066562 | 2.0955502418  | 2.20720691    |
| H | -0.4016443115 | 4.5533800932  | 2.1264932137  |
| H | 0.0584010945  | -0.3633840345 | 2.665837116   |
| H | 1.7143527765  | -0.2826146476 | 2.0486756141  |
| H | 0.7640081609  | -1.7650211415 | 1.8564825129  |

**Tab. 11** Standard orientation of  $3^+$  [global minimum, B3LYP/6-31+G(d)].

| atomic symbol | x             | y             | z             |
|---------------|---------------|---------------|---------------|
| Si            | -0.7189991774 | -0.3982822655 | 0.6131388016  |
| C             | -0.6564497282 | 1.4161717075  | 0.1574515895  |
| Si            | -2.6882250398 | -1.3908633448 | -0.3056634155 |
| C             | -2.6351988785 | -1.3150162476 | -2.212514169  |
| C             | -4.2160681274 | -0.4007491517 | 0.2674692432  |
| N             | 2.0903605549  | -0.7733786396 | -0.2236363483 |
| C             | -2.9626884326 | -3.2125666807 | 0.2003353423  |
| C             | 3.0444592132  | -1.6687183212 | -0.8780854393 |
| C             | 2.6001298886  | -0.2976416575 | 1.060250228   |
| C             | 3.9348251598  | 0.4395181621  | 0.8968954622  |
| C             | 0.7609438644  | -1.3906141289 | -0.1356352375 |
| C             | 4.3933029761  | -0.9832383691 | -1.1232754689 |
| C             | 4.9750911152  | -0.4369255069 | 0.1872315307  |
| C             | -0.0093342176 | 1.8796925326  | -1.0245397347 |
| C             | -0.0295816329 | 3.2228948842  | -1.391784742  |
| C             | -0.7053054265 | 4.1755468283  | -0.6055565755 |
| C             | -1.3726313571 | 2.3921309679  | 0.908528602   |
| C             | -1.3961115974 | 3.7343681955  | 0.5400577848  |
| C             | -0.8113110571 | -0.623026502  | 2.5095855827  |
| H             | -3.5736400216 | -1.7040959837 | -2.6342274444 |
| H             | -1.8151229741 | -1.9212625472 | -2.6201545995 |
| H             | -2.5030487065 | -0.2859656207 | -2.5736329256 |

|   |               |               |               |
|---|---------------|---------------|---------------|
| H | -5.1271517428 | -0.8049831744 | -0.1981594385 |
| H | -4.1376040913 | 0.6605269409  | -0.0039844094 |
| H | -4.3477961676 | -0.4594789845 | 1.356192678   |
| H | -3.8990974577 | -3.592424923  | -0.2430327054 |
| H | -3.0402349871 | -3.3216848288 | 1.2908259488  |
| H | -2.1451956084 | -3.8622176268 | -0.1412720429 |
| H | 2.6082418307  | -1.9939882657 | -1.8315586723 |
| H | 3.2037719801  | -2.5887953817 | -0.2709432788 |
| H | 2.7272816422  | -1.1418245308 | 1.775530533   |
| H | 1.85753799    | 0.3820676695  | 1.491569066   |
| H | 4.2989901847  | 0.7507958661  | 1.8861734663  |
| H | 3.7592388408  | 1.3526200979  | 0.3120202683  |
| H | 0.4706644274  | -1.6707413654 | -1.1601577531 |
| H | 0.8035945849  | -2.3521882314 | 0.4246822766  |
| H | 5.0860306776  | -1.6986816583 | -1.5896035647 |
| H | 4.2475028872  | -0.1581103659 | -1.8342530857 |
| H | 5.8985442132  | 0.1297403736  | -0.0027462822 |
| H | 5.249362947   | -1.279630452  | 0.8411792671  |
| H | 0.5448322899  | 1.1753984131  | -1.6408736968 |
| H | 0.4954819821  | 3.538508379   | -2.2930267972 |
| H | -0.7094519516 | 5.2265149445  | -0.8866289219 |
| H | -1.9092088796 | 2.0915712341  | 1.807866589   |
| H | -1.9467189307 | 4.448751081   | 1.15150655    |
| H | -1.7555418415 | -0.2271662068 | 2.9100780003  |
| H | 0.011793078   | -0.1211697532 | 3.0346190766  |
| H | -0.7768243732 | -1.6914947006 | 2.7657152791  |

**Tab. 12** Standard orientation of **9** [global minimum, B3LYP/6-31+G(d)].

| atomic symbol | x             | y             | z             |
|---------------|---------------|---------------|---------------|
| Si            | -0.0486360076 | 0.0663129609  | -0.0507008795 |
| C             | -0.1131583044 | 1.9604530463  | -0.191159887  |
| H             | -0.5954313922 | 2.4127810721  | 0.6844881064  |
| Si            | -2.2383904012 | -0.8547439215 | 0.0241214792  |
| C             | -3.230975045  | -0.3698232576 | -1.5280293438 |
| C             | -3.1685819257 | -0.2061203521 | 1.5550257297  |
| N             | 2.0183018953  | 0.0264520679  | -2.1053831943 |
| C             | -2.1726820112 | -2.7562983957 | 0.1231032153  |
| C             | 2.2924759858  | -0.2919795406 | -3.5120400928 |
| C             | 3.1807790643  | -0.2760919598 | -1.267560256  |
| C             | 4.4211192577  | 0.5082947862  | -1.7113507993 |
| C             | 0.7978682787  | -0.6395028373 | -1.631680961  |
| C             | 3.4938541627  | 0.4936736934  | -4.0477102722 |
| C             | 4.7405267454  | 0.2450857628  | -3.188618025  |
| H             | -0.6656581355 | 2.2802351453  | -1.0831235699 |

|   |               |               |               |
|---|---------------|---------------|---------------|
| C | 0.8552150373  | -0.4018754226 | 1.5641506534  |
| H | -4.2473858116 | -0.783665553  | -1.4806008301 |
| H | -2.7639630235 | -0.748869214  | -2.4458505822 |
| H | -3.3223348393 | 0.7189924226  | -1.6277145854 |
| H | -4.1800978065 | -0.6319202007 | 1.6020249573  |
| H | -3.271086431  | 0.8861432387  | 1.533631696   |
| H | -2.6551696803 | -0.4732969027 | 2.4872518483  |
| H | -3.1864371187 | -3.1762867149 | 0.1742584679  |
| H | -1.6289663886 | -3.0979971794 | 1.012850751   |
| H | -1.6786076037 | -3.1918120475 | -0.754551366  |
| H | 1.3973479381  | -0.0494806635 | -4.0967653359 |
| H | 2.4768887018  | -1.3817697667 | -3.6382613287 |
| H | 3.4059740987  | -1.3658221643 | -1.2927628057 |
| H | 2.9377623667  | -0.029002925  | -0.2303746015 |
| H | 5.2710171214  | 0.2305258567  | -1.0739793596 |
| H | 4.2356287965  | 1.5803575766  | -1.5583305475 |
| H | 0.0431710376  | -0.5274443781 | -2.4231869639 |
| H | 0.9498639716  | -1.7363043488 | -1.5243624649 |
| H | 3.6769993145  | 0.2072823443  | -5.091811158  |
| H | 3.247405949   | 1.5642450363  | -4.0414202248 |
| H | 5.574539607   | 0.875461644   | -3.5233720325 |
| H | 5.0641972747  | -0.799865077  | -3.3103597246 |
| H | 0.900352129   | 2.3718820925  | -0.2724125468 |
| H | 0.2291594924  | -0.1679977328 | 2.4349691636  |
| H | 1.7974836935  | 0.1457701315  | 1.6892186129  |
| H | 1.0849300064  | -1.4741783223 | 1.6035790577  |

**Tab. 13** Standard orientation of  $9^-$  [global minimum, B3LYP/6-31+G(d)].

| atomic symbol | x             | y             | z             |
|---------------|---------------|---------------|---------------|
| Si            | 0.8595217752  | 0.7036961374  | 0.1841930644  |
| C             | 0.5754451298  | 1.1883531226  | 2.0020034327  |
| H             | 1.3489085722  | 1.8858957772  | 2.3509788121  |
| Si            | 2.9343128586  | -0.423689302  | -0.0836564435 |
| C             | 2.9685907682  | -2.0283936197 | 0.9451792008  |
| C             | 4.361247451   | 0.698847705   | 0.4940406465  |
| N             | -1.8885498351 | -0.32656532   | 0.0713640106  |
| C             | 3.215092843   | -0.8721204966 | -1.9159116654 |
| C             | -2.7112128996 | -1.5198977121 | -0.1349335365 |
| C             | -2.4931209812 | 0.8465807851  | -0.5574260894 |
| C             | -3.9029492382 | 1.1179424804  | -0.0197991732 |
| C             | -0.4992695189 | -0.5557799845 | -0.3525045544 |
| C             | -4.1231066761 | -1.3424859816 | 0.4327098039  |
| C             | -4.8068667448 | -0.1110040128 | -0.1741980275 |
| H             | 0.5966696475  | 0.3059531957  | 2.6570412597  |



|   |               |               |               |
|---|---------------|---------------|---------------|
| C | 0.8839973683  | 2.2691309818  | -0.9103654255 |
| H | 3.9413744506  | -2.5296451854 | 0.84215552    |
| H | 2.1944565383  | -2.738983338  | 0.6211233835  |
| H | 2.8107057524  | -1.8267086183 | 2.0144088201  |
| H | 5.327589827   | 0.1901828341  | 0.3608229424  |
| H | 4.2643039051  | 0.9581039663  | 1.557903128   |
| H | 4.3962370969  | 1.6375350357  | -0.0771498469 |
| H | 4.1945474081  | -1.3518746051 | -2.0496403503 |
| H | 3.1905512155  | 0.0201265093  | -2.557825257  |
| H | 2.4499835215  | -1.5706982296 | -2.2838586843 |
| H | -2.2132056507 | -2.3658480239 | 0.3575022223  |
| H | -2.7774720586 | -1.7734664735 | -1.2171644053 |
| H | -2.5357950612 | 0.723753691   | -1.6631627864 |
| H | -1.8556434311 | 1.7155503547  | -0.3632052963 |
| H | -4.3279750669 | 1.9844955302  | -0.5465343215 |
| H | -3.8287891183 | 1.390491752   | 1.0421472719  |
| H | -0.1895029745 | -1.5144819606 | 0.0907903665  |
| H | -0.4356834181 | -0.7068803876 | -1.4537611704 |
| H | -4.7104995099 | -2.2519290026 | 0.2376857748  |
| H | -4.0533685683 | -1.2263573913 | 1.5230989842  |
| H | -5.7856274419 | 0.064409976   | 0.2973224174  |
| H | -4.9976908457 | -0.2919094799 | -1.2433822339 |
| H | -0.4002087483 | 1.6750691577  | 2.1306286587  |
| H | 1.7992219696  | 2.8500490571  | -0.726421007  |
| H | 0.0346595222  | 2.9365692656  | -0.7150712569 |
| H | 0.8691295604  | 2.0093834109  | -1.9790128844 |

---

## Literature

- [1] a) Gaussian 03, Revision D.01, M. J. Frisch, G. W. Trucks, H. B. Schlegel, G. E. Scuseria, M. A. Robb, J. R. Cheeseman, J. A. Montgomery, Jr., T. Vreven, K. N. Kudin, J. C. Burant, J. M. Millam, S. S. Iyengar, J. Tomasi, V. Barone, B. Mennucci, M. Cossi, G. Scalmani, N. Rega, G. A. Petersson, H. Nakatsuji, M. Hada, M. Ehara, K. Toyota, R. Fukuda, J. Hasegawa, M. Ishida, T. Nakajima, Y. Honda, O. Kitao, H. Nakai, M. Klene, X. Li, J. E. Knox, H. P. Hratchian, J. B. Cross, V. Bakken, C. Adamo, J. Jaramillo, R. Gomperts, R. E. Stratmann, O. Yazyev, A. J. Austin, R. Cammi, C. Pomelli, J. W. Ochterski, P. Y. Ayala, K. Morokuma, G. A. Voth, P. Salvador, J. J. Dannenberg, V. G. Zakrzewski, S. Dapprich, A. D. Daniels, M. C. Strain, O. Farkas, D. K. Malick, A. D. Rabuck, K. Raghavachari, J. B. Foresman, J. V. Ortiz, Q. Cui, A. G. Baboul, S. Clifford, J. Cioslowski, B. B. Stefanov, G. Liu, A. Liashenko, P. Piskorz, I. Komaromi, R. L. Martin, D. J. Fox, T. Keith, M. A. Al-Laham, C. Y. Peng, A. Nanayakkara, M. Challacombe, P. M. W. Gill, B. Johnson, W. Chen, M. W. Wong, C. Gonzalez, and J. A. Pople, Gaussian, Inc., Wallingford CT, 2004; b) Gaussian 03, Revision E.01, M. J. Frisch, G. W. Trucks, H. B. Schlegel, G. E. Scuseria, M. A. Robb, J. R. Cheeseman, J. A. Montgomery, Jr., T. Vreven, K. N. Kudin, J. C. Burant, J. M. Millam, S. S. Iyengar, J. Tomasi, V. Barone, B. Mennucci, M. Cossi, G. Scalmani, N. Rega, G. A. Petersson, H. Nakatsuji, M. Hada, M. Ehara, K. Toyota, R. Fukuda, J. Hasegawa, M. Ishida, T. Nakajima, Y. Honda, O. Kitao, H. Nakai, M. Klene, X. Li, J. E. Knox, H. P. Hratchian, J. B. Cross, V. Bakken, C. Adamo, J. Jaramillo, R. Gomperts, R. E. Stratmann, O. Yazyev, A. J. Austin, R. Cammi, C. Pomelli, J. W. Ochterski, P. Y. Ayala, K. Morokuma, G. A. Voth, P. Salvador, J. J. Dannenberg, V. G. Zakrzewski, S. Dapprich, A. D. Daniels, M. C. Strain, O. Farkas, D. K. Malick, A. D. Rabuck, K. Raghavachari, J. B. Foresman, J. V. Ortiz, Q. Cui, A. G. Baboul, S. Clifford, J. Cioslowski, B. B. Stefanov, G. Liu, A. Liashenko, P. Piskorz, I. Komaromi, R. L. Martin, D. J. Fox, T. Keith, M. A. Al-Laham, C. Y. Peng, A. Nanayakkara, M. Challacombe, P. M. W. Gill, B. Johnson, W. Chen, M. W. Wong, C. Gonzalez, and J. A. Pople, Gaussian, Inc., Wallingford CT, 2004.
- [2] C. Däschlein, V. H. Gessner, C. Strohmann, *Acta Crystallogr. Sect. E*, 2008, **64**, o1950 .
- [3] C. Strohmann, C. Däschlein, M. Kellert, D. Auer, *Angew. Chem.*, 2007, **119**, 4864; *Angew. Chem. Int. Ed.*, 2007, **46**, 4780.
